# Supplementary material for: Potential limitations in systematic review studies assessing the effect of the main intervention for treatment/therapy of COVID-19 patients: An overview
Source: PubMed Central journal article supplement (PMC9531544; doi:10.3389/fmed.2022.966632), 2022-09-15
Supplement: Table_1.pdf [file Table_1.pdf]

Supplementary table 1: Database search strategy

| Database | Query                                                                                                                                                   | Number |
|----------|---------------------------------------------------------------------------------------------------------------------------------------------------------|--------|
| PubMed   | ((COVID-19[Title] OR "SARS-CoV-2"[Title] OR "novel coronavirus"[Title]) AND ("systematic review"[Title])) AND (limitation OR limitations)               | 409    |
| Scopus   | ( TITLE ( covid-19 OR "SARS-CoV-2" OR "novel coronavirus" ) AND TITLE ( "systematic review" ) AND ALL ( limitation OR limitations ) )                   | 214    |
| WOS      | You searched for: TITLE: (COVID-19 OR "SARS-CoV-2" OR "novel coronavirus") AND TITLE: ("systematic review") AND ALL FIELDS: (limitation OR limitations) | 122    |

Supplementary table 2: Quality appraisal of included systematic reviews

| Authors/Year                       | Q1  | Q2  | Q3  | Q4  | Q5  | Q6  | Q7  | Q8  | Q9  | Q10 | Score |
|------------------------------------|-----|-----|-----|-----|-----|-----|-----|-----|-----|-----|-------|
| Abdelrahman et al, 2021            | Yes | Yes | Yes | Yes | Yes | No  | Yes | Yes | Yes | Yes | 9     |
| Al-Abdoun et al, 2021              | Yes | Yes | Yes | Yes | Yes | Yes | Yes | Yes | Yes | Yes | 10    |
| Angamo et al, 2021                 | Yes | Yes | Yes | Yes | Yes | Yes | Yes | Yes | Yes | Yes | 10    |
| Ayele Mega et al, 2020             | Yes | Yes | Yes | Yes | Yes | Yes | Yes | Yes | Yes | Yes | 10    |
| Bansal et al, 2020                 | Yes | Yes | Yes | Yes | Yes | Yes | Yes | Yes | Yes | Yes | 10    |
| Bartoszko et al, 2021              | Yes | Yes | Yes | Yes | Yes | Yes | Yes | Yes | Yes | Yes | 10    |
| Bhattacharyya et al, 2020          | Yes | Yes | Yes | Yes | Yes | Yes | Yes | Yes | Yes | Yes | 10    |
| Conti et al, 2021                  | Yes | Yes | Yes | Yes | Yes | Yes | Yes | Yes | Yes | Yes | 10    |
| Cruciani et al, 2021               | Yes | Yes | Yes | Yes | Yes | Yes | Yes | Yes | Yes | Yes | 10    |
| Das et al, 2020                    | Yes | Yes | Yes | Yes | Yes | Yes | Yes | Yes | Yes | Yes | 10    |
| Diaz-Arocutipa et al, 2020         | Yes | Yes | Yes | Yes | Yes | Yes | Yes | Yes | Yes | Yes | 10    |
| Elsawah et al, 2020                | Yes | Yes | Yes | Yes | Yes | Yes | Yes | Yes | Yes | Yes | 10    |
| Fiolet et al, 2021                 | Yes | Yes | Yes | Yes | Yes | Yes | Yes | Yes | Yes | Yes | 10    |
| Gholamhoseini et al, 2021          | Yes | Yes | Yes | Yes | Yes | Yes | Yes | Yes | Yes | Yes | 10    |
| Hassanipour et al, 2021            | Yes | Yes | Yes | Yes | Yes | Yes | Yes | Yes | Yes | Yes | 10    |
| Hernandez et al, 2020              | Yes | Yes | Yes | Yes | Yes | Yes | Yes | Yes | Yes | Yes | 10    |
| Hussain et al, 2021                | Yes | Yes | Yes | Yes | Yes | Yes | Yes | Yes | Yes | Yes | 10    |
| Jankelson et al, 2020              | Yes | Yes | Yes | Yes | Yes | No  | No  | Yes | No  | Yes | 8     |
| Juul et al, 2020                   | Yes | Yes | Yes | Yes | Yes | Yes | Yes | Yes | Yes | Yes | 10    |
| Juul et al, 2021                   | Yes | Yes | Yes | Yes | Yes | Yes | Yes | Yes | Yes | Yes | 10    |
| Kaka et al, 2020                   | Yes | Yes | Yes | Yes | Yes | Yes | Yes | Yes | Yes | Yes | 10    |
| Kim et al, 2020                    | Yes | Yes | Yes | Yes | Yes | Yes | Yes | Yes | Yes | Yes | 10    |
| Kotak et al, 2020                  | Yes | Yes | Yes | Yes | Yes | Yes | Yes | Yes | Yes | Yes | 10    |
| Lai et al, 2021                    | Yes | Yes | Yes | Yes | Yes | Yes | Yes | Yes | Yes | Yes | 10    |
| Manabe et al, 2021                 | Yes | Yes | Yes | Yes | Yes | Yes | Yes | Yes | Yes | Yes | 10    |
| Manzo-Toledo et al, 2021           | Yes | Yes | Yes | Yes | Yes | Yes | Yes | No  | Yes | Yes | 9     |
| Murchu et al, 2021                 | Yes | Yes | Yes | Yes | Yes | Yes | Yes | No  | No  | Yes | 8     |
| Okoli et al, 2021                  | Yes | Yes | Yes | Yes | Yes | Yes | Yes | Yes | Yes | Yes | 10    |
| Özlüşen et al, 2021                | Yes | Yes | Yes | Yes | Yes | Yes | Yes | Yes | Yes | Yes | 10    |
| Padhy et al, 2020                  | Yes | Yes | Yes | Yes | Yes | Yes | Yes | Yes | Yes | Yes | 10    |
| Piscoya et al, 2020                | Yes | No  | Yes | Yes | Yes | Yes | Yes | Yes | Yes | Yes | 9     |
| Prakash et al, 2020                | Yes | Yes | Yes | Yes | Yes | Yes | Yes | Yes | Yes | Yes | 10    |
| Qomara et al, 2021                 | Yes | Yes | Yes | Yes | Yes | Yes | Yes | No  | No  | Yes | 8     |
| Rezagholidzadeh et al, 2021        | Yes | Yes | Yes | Yes | Yes | Yes | Yes | Yes | Yes | Yes | 10    |
| Roshanshad et al, 2020             | Yes | Yes | Yes | No  | Yes | Yes | Yes | No  | No  | Yes | 7     |
| Santenna et al, 2021               | Yes | Yes | Yes | Yes | Yes | Yes | No  | Yes | Yes | Yes | 9     |
| Sarfraz et al, 2020                | Yes | Yes | Yes | Yes | Yes | No  | No  | Yes | Yes | No  | 7     |
| Shrestha et al, 2020a              | Yes | Yes | Yes | Yes | Yes | Yes | Yes | Yes | Yes | Yes | 10    |
| Shrestha et al, 2020b              | Yes | Yes | Yes | Yes | Yes | Yes | Yes | Yes | Yes | Yes | 10    |
| Siemieniuk et al, 2020             | Yes | Yes | Yes | Yes | Yes | Yes | Yes | Yes | Yes | Yes | 10    |
| Singh et al, 2020                  | Yes | Yes | Yes | Yes | Yes | Yes | Yes | Yes | Yes | Yes | 10    |
| Thiruchelvam et al, 2021           | Yes | Yes | Yes | Yes | Yes | No  | Yes | No  | No  | Yes | 7     |
| Thoguluva Chandrasekar et al, 2020 | Yes | Yes | Yes | Yes | Yes | Yes | Yes | Yes | Yes | Yes | 10    |
| Vegivinti et al, 2020              | Yes | Yes | Yes | Yes | Yes | Yes | Yes | Yes | Yes | Yes | 10    |
| Verdugo-Paiva et al, 2020          | Yes | Yes | Yes | Yes | Yes | Yes | Yes | Yes | Yes | No  | 9     |
| Wilt et al, 2020                   | Yes | Yes | Yes | Yes | Yes | Yes | Yes | No  | No  | No  | 7     |
| Total                              | 46  | 45  | 46  | 45  | 46  | 42  | 43  | 40  | 40  | 43  | 437   |
